# Supplementary material for: Characteristics of Circulating CD4+ T Cell Subsets in Patients with Mycobacterium avium Complex Pulmonary Disease
Source: PubMed Central journal article supplement (PMC7290757; doi:10.3390/jcm9051331), 2020-05-03
Supplement: jcm-09-01331-s001.pdf [file jcm-09-01331-s001.pdf]

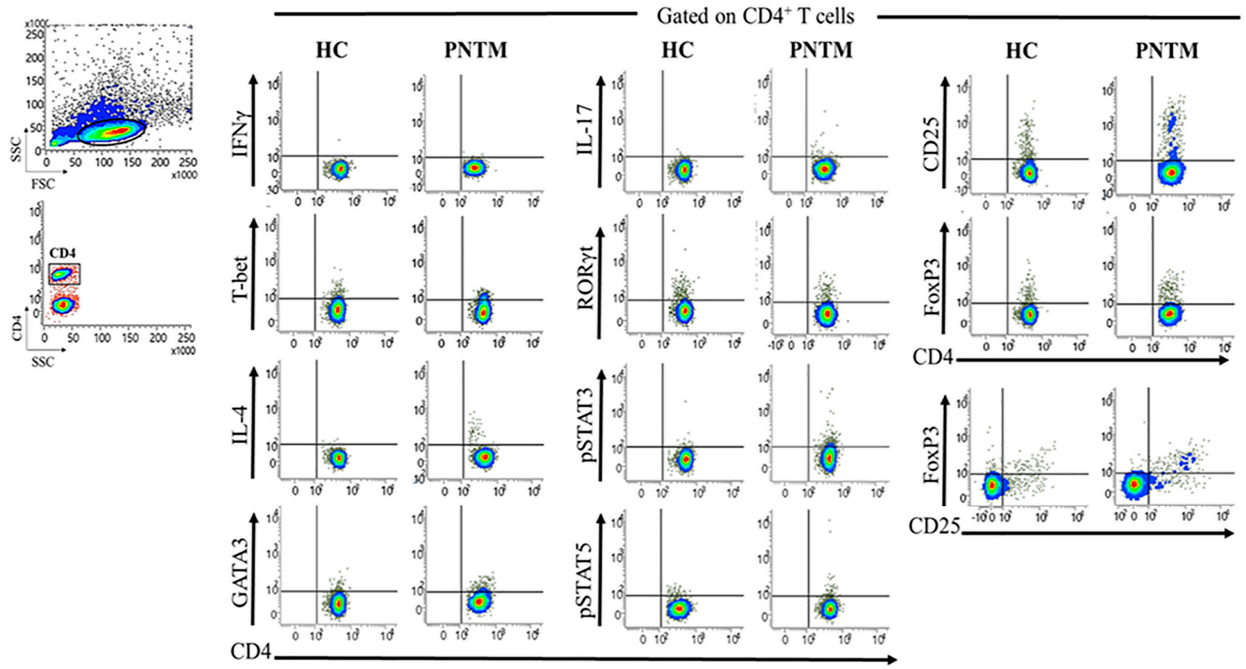

Figure S1. Overview of flow cytometry gating strategy. FSC, forward scatter; SSC, side scatter.
